# Supplementary material for: Spatially informed clustering, integration, and deconvolution of spatial transcriptomics with GraphST
Source: bioRxiv or medRxiv preprint supplement (doi:10.1101/2022.08.02.502407), 2023-01-05
Supplement: Supplementary file [file media-2.pdf]

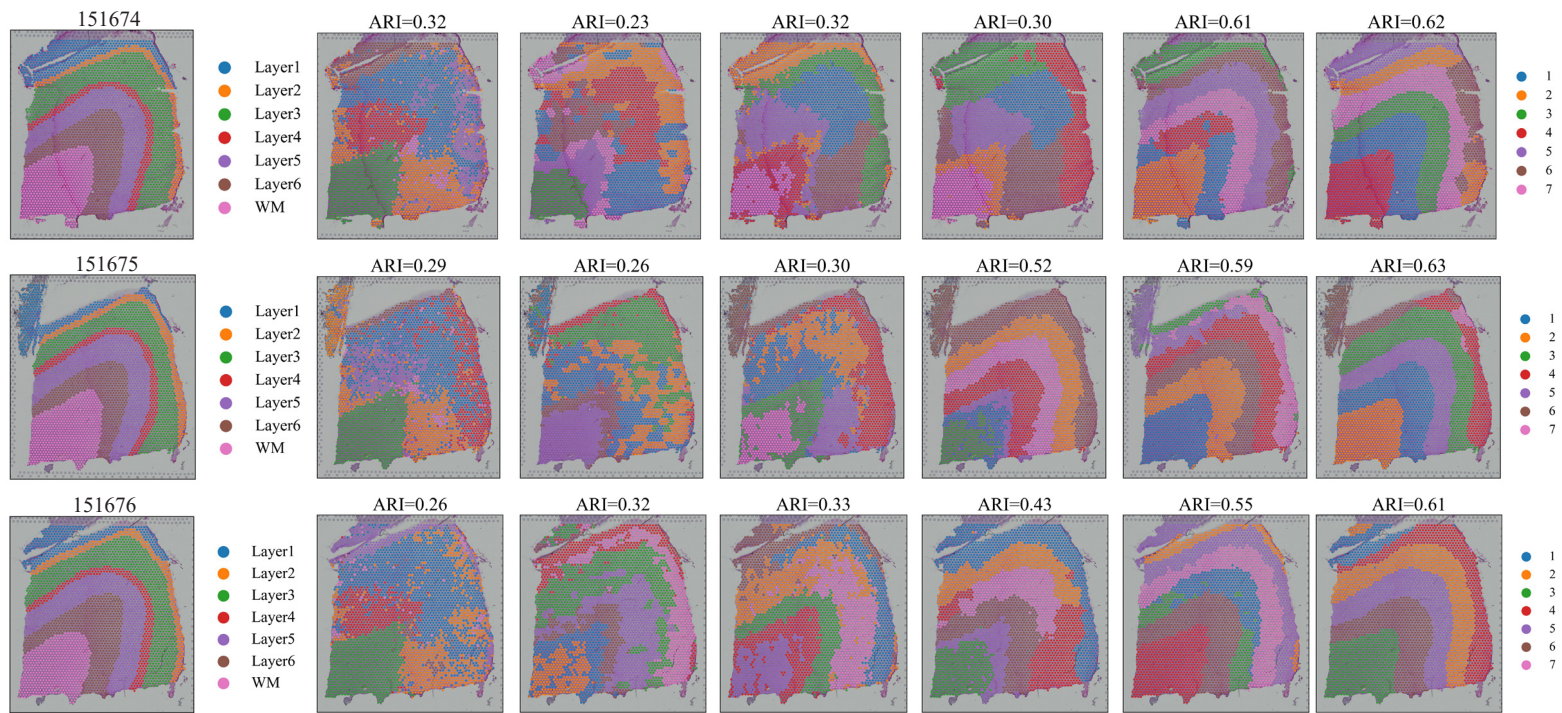

**Figure S1. Manual annotations and comparison of spatial domains identified by Seurat, Giotto, SpaGCN, BayesSpace, STAGATE, and DeepST on the 12 slices of DLPFC dataset.**
