# Supplementary material for: Spatially informed clustering, integration, and deconvolution of spatial transcriptomics with GraphST
Source: bioRxiv or medRxiv preprint supplement (doi:10.1101/2022.08.02.502407), 2023-01-05
Supplement: Supplementary file [file media-6.pdf]

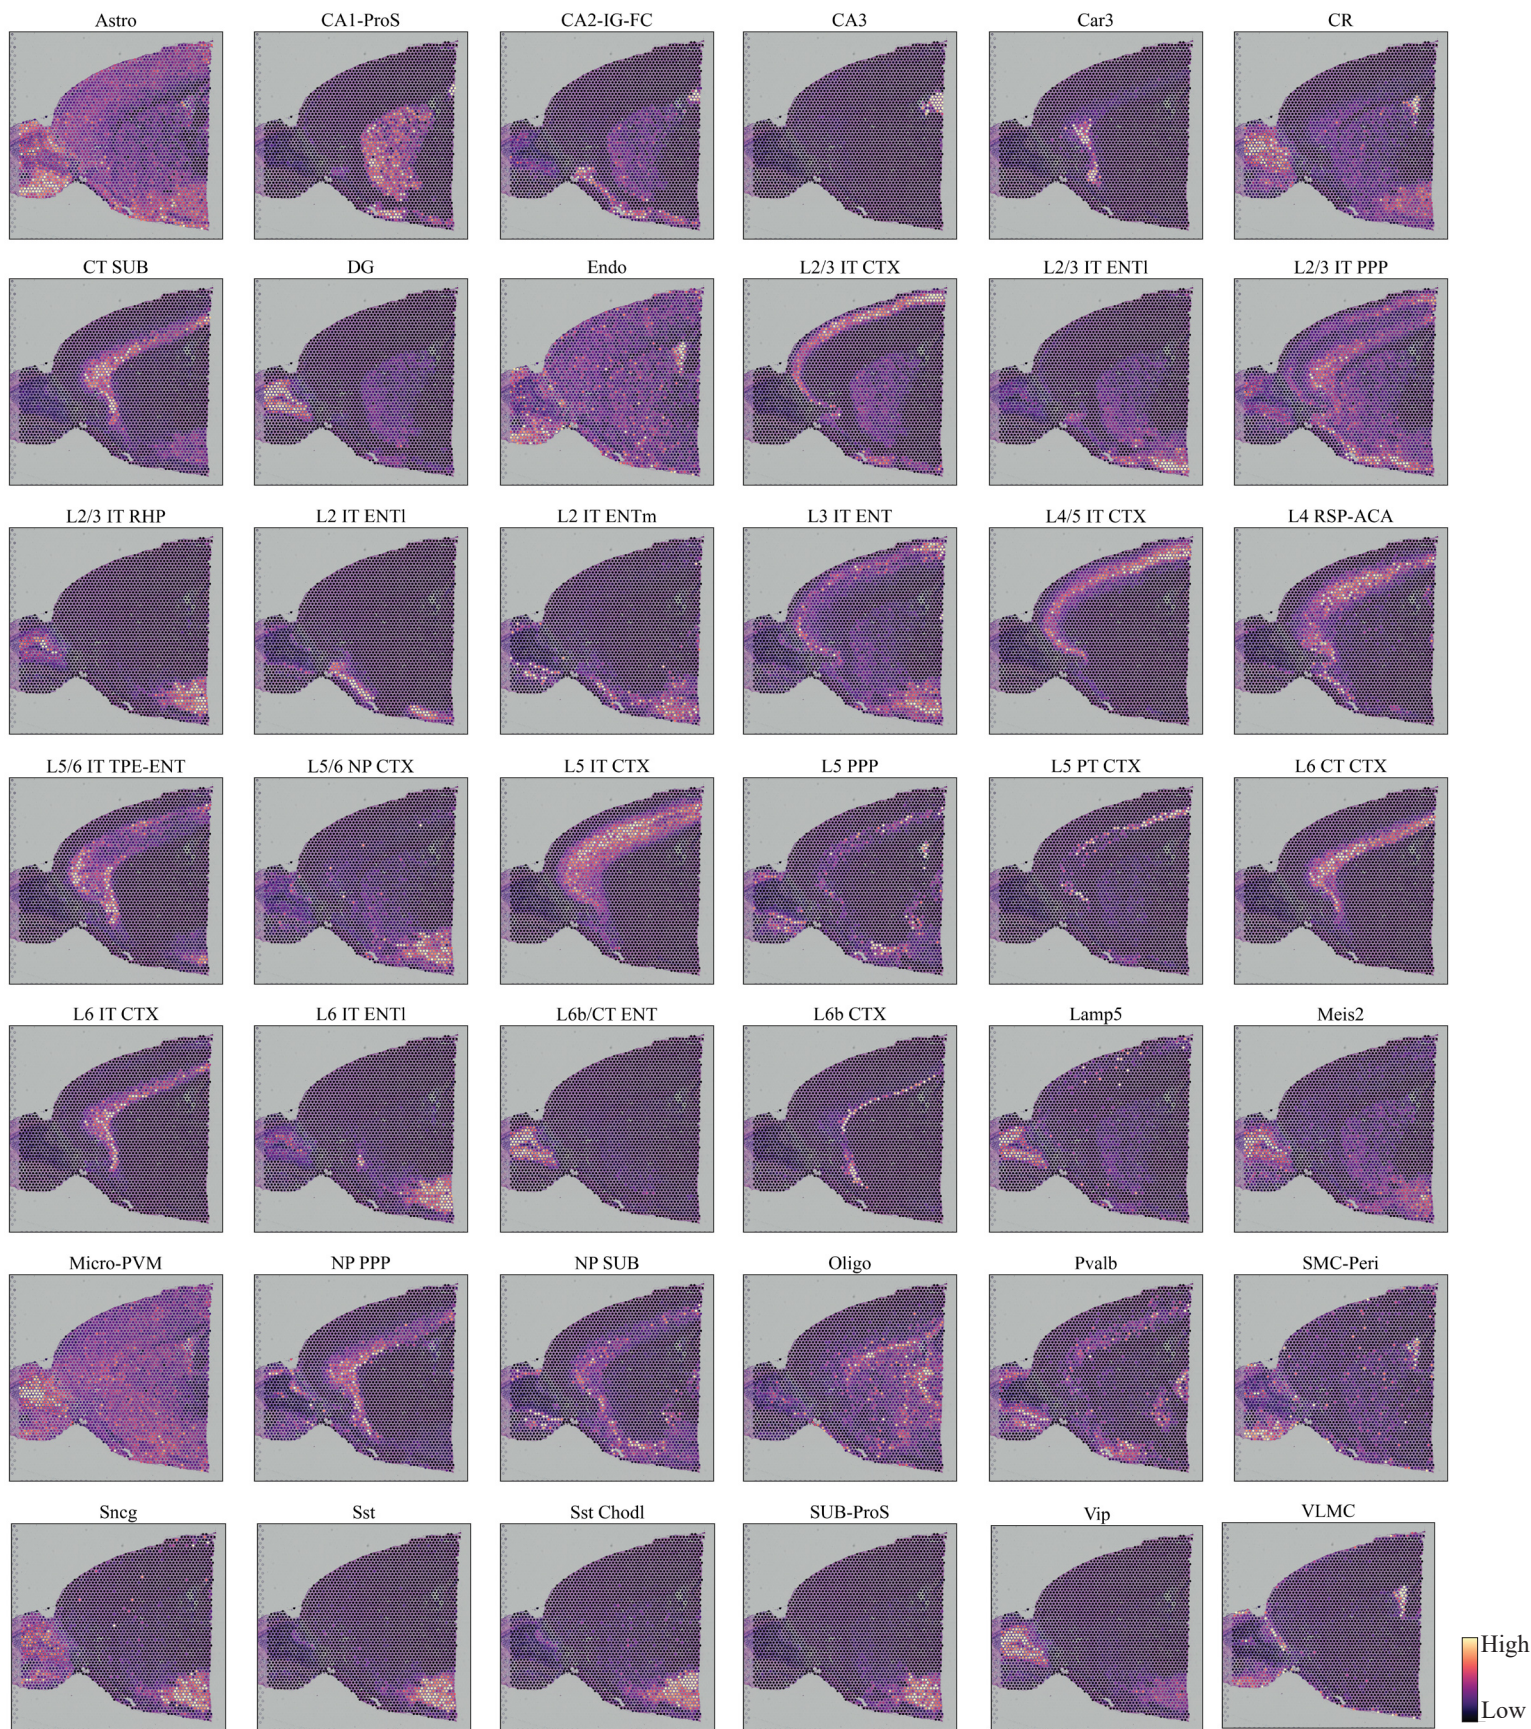

Figure S5. Spatial distributions predicted by cell2location of all 42 cell types in mouse brain anterior dataset.
