# Supplementary material for: Spatially informed clustering, integration, and deconvolution of spatial transcriptomics with GraphST
Source: bioRxiv or medRxiv preprint supplement (doi:10.1101/2022.08.02.502407), 2023-01-05
Supplement: Supplementary file [file media-9.pdf]

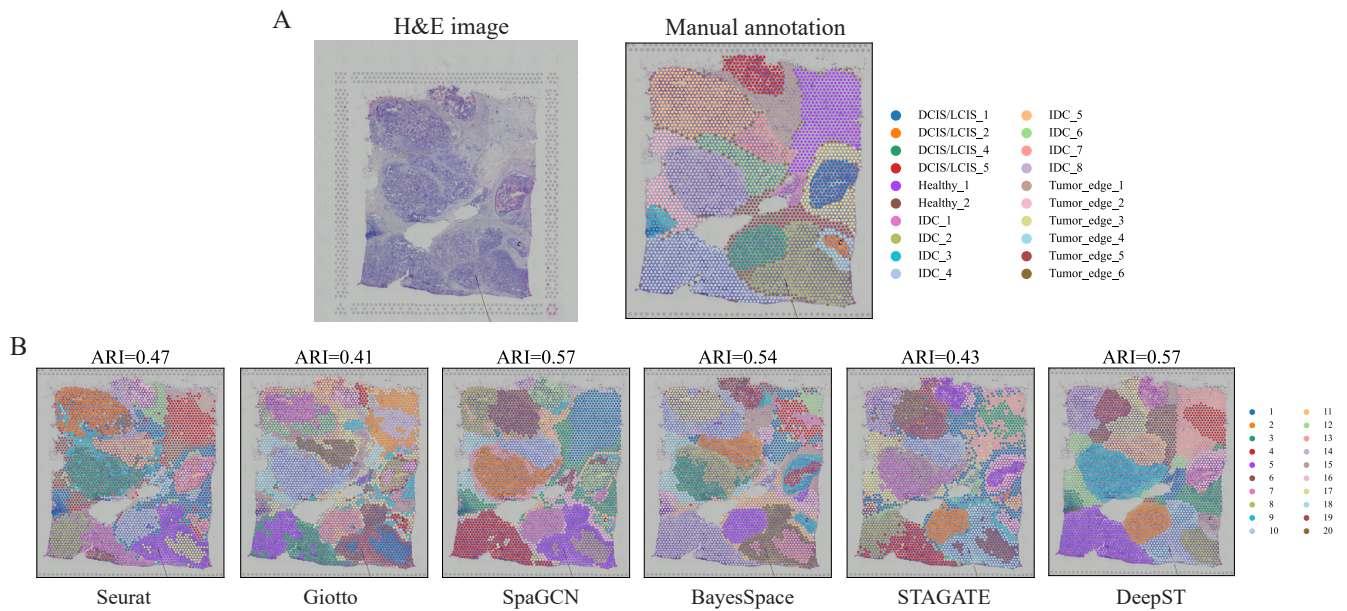

**Figure S8. DeepST clustering improves the identification of tissue structures in the human breast cancer dataset. A.** H&E image and manual annotation. **B.** Comparison of spatial domains identified by Seurat, Giotto, SpaGCN, BayesSpace, STAGATE, and DeepST in the human breast cancer dataset.
